# Supplementary material
Source: publisher site journal article supplement (https://www.spandidos-publications.com/4738/downloadSupplementary)
Supplement: Supplementary file 1 [file downloadSupplementary]

## Sheet: Supplementary Table 4
Table SIV. Immune cell infiltration and immune scores generated by xCell from TCGA.
Cell types	TCGA.HS.A5N9.01	TCGA.JV.A75J.01	TCGA.WP.A9GB.01	TCGA.3B.A9HV.01	TCGA.DX.A7EQ.01	TCGA.DX.AB3C.01	TCGA.DX.A2IZ.01	TCGA.SG.A6Z7.01	TCGA.WK.A8XT.01	TCGA.HB.A3L4.01	TCGA.SI.A71Q.01	TCGA.IE.A4EK.01	TCGA.PT.A8TR.01	TCGA.DX.A48U.01	TCGA.DX.A7ER.01	TCGA.K1.A42X.01	TCGA.DX.A48R.01	TCGA.DX.AB30.01	TCGA.IW.A3M4.01	TCGA.DX.A7EN.01	TCGA.K1.A42X.02	TCGA.DX.A3UE.01	TCGA.DX.A1KY.01	TCGA.3B.A9HR.01	TCGA.FX.A3RE.01	TCGA.FX.A8OO.01	TCGA.PC.A5DP.01	TCGA.X6.A7WB.01	TCGA.DX.A6B8.01	TCGA.DX.AB2J.01	TCGA.DX.A6B7.01	TCGA.DX.A7EF.01	TCGA.WK.A8XY.01	TCGA.MJ.A68H.01	TCGA.DX.A3U7.01	TCGA.K1.A3PN.02	TCGA.HB.A3YV.01	TCGA.DX.A3U9.01	TCGA.KD.A5QT.01	TCGA.MO.A47R.01	TCGA.DX.A8BU.01	TCGA.X2.A95T.01	TCGA.3B.A9I1.01	TCGA.IS.A3K6.01	TCGA.DX.A3UD.01	TCGA.WK.A8XS.01	TCGA.SI.AA8B.01	TCGA.IS.A3K8.01	TCGA.X6.A8C4.01
Adipocytes	0.0028	0.0041	0.005	0.0079	0	0	0	0	0	0	0.0056	0	0.0096	0	0	0	0.0001	0.0021	0	0	0	0.0021	0.004	0	0.0088	0	0	0	0	0	0	0	0	0.003	0.0089	0.0084	0	0.0026	0	0	0	0.0005	0.0027	0.0142	0.0085	0	0	0.0046	0
Astrocytes	0	0	0.0109	0	0	0	0	0.074	0	0	0.0995	0	0	0	0	0	0	0.0665	0	0	0	0	0	0	0	0	0	0	0.0419	0	0	0	0	0	0	0	0	0	0	0	0.0612	0	0	0	0	0	0	0	0
B-cells	0	0	0	0	0	0	0	0	0	0	0	0	0	0	0	0	0.0045	0	0	0	0.0002	0	0	0	0	0.0009	0	0	0	0.0205	0	0.0094	0	0	0	0	0	0	0	0	0.0351	0	0	0.0302	0	0	0.0224	0	0.0074
Basophils	0.0339	0.0756	0.0249	0.0316	0.0886	0.0299	0.0117	0.0046	0.0834	0.0361	0	0	0.0339	0.0398	0.0748	0.0102	0.0483	0	0.0947	0.0437	0.0261	0.0042	0.0565	0	0.0239	0.0908	0.006	0	0.1404	0	0.0393	0.0219	0	0	0	0	0.0485	0	0	0.0014	0.0522	0.0048	0	0.0132	0.0043	0	0.0385	0	0.0664
CD4+ T-cells	0	0	0	0	0	0	0	0	0	0	0	0	0	0	0	0.0027	0	0	0	0	0	0	0	0	0	0	0	0	0	0	0	0	0	0	0	0	0	0	0.0021	0	0	0.0075	0.0078	0	0	0	0	0	0
CD4+ Tcm	0	0	0	0.0027	0.0657	0.0722	0.0049	0.0437	0.0482	0.022	0	0.024	0.0803	0.0226	0.0947	0.0454	0	0	0.0154	0	0.0414	0.0149	0	0	0.003	0.034	0	0	0	0.0233	0.0043	0.0229	0	0	0	0	0	0	0.0417	0.0119	0	0.0055	0.0278	0.002	0.0217	0	0	0	0
CD4+ Tem	0	0	0	0	0	0.0625	0	0	0	0	0	0	0	0.0279	0.03	0	0.0204	0	0	0	0	0.0187	0	0	0	0	0	0	0	0	0	0.0258	0	0	0	0	0	0	0	0.0277	0	0	0.0253	0.0569	0	0	0	0	0.0045
CD4+ memory T-cells	0.0021	0	0	0	0	0	0	0	0	0	0	0	0	0	0	0	0	0	0	0	0	0	0	0	0	0	0.0006	0	0	0	0	0.0052	0	0	0.0028	0	0	0	0	0	0.0139	0.0022	0	0	0	0	0.0006	0	0.0029
CD4+ naive T-cells	0	0	0	0	0	0	0	0	0	0	0	0	0	0	0	0	0	0	0	0	0	0	0	0	0	0	0	0	0	0	0	0	0	0	0	0	0	0	0	0.0273	0	0	0	0	0	0	0.0171	0	0
CD8+ T-cells	0	0	0	0	0	0	0.0324	0	0.018	0.0005	0	0	0.0197	0	0	0.0663	0	0	0.0057	0	0.0577	0	0	0	0	0.0105	0	0	0	0.0072	0.003	0	0	0	0	0	0	0	0.0152	0.0118	0	0.0086	0	0.0772	0	0	0.0108	0.005	0.0378
CD8+ Tcm	0	0	0	0	0.0106	0	0.0007	0	0.0289	0	0	0.0066	0	0	0	0	0	0	0.0012	0	0	0	0.0016	0	0	0.0259	0.0128	0	0	0	0	0	0	0	0	0	0.0033	0	0.017	0.0324	0.0133	0.018	0.0003	0.0866	0.0099	0	0	0	0.0369
CD8+ Tem	0	0	0	0	0	0	0	0	0	0	0	0	0	0	0	0	0	0	0	0	0	0	0	0	0	0	0	0	0	0	0	0	0	0	0	0	0	0	0	0	0	0.0014	0	0.0158	0	0	0	0	0
CD8+ naive T-cells	0.009	0.0017	0	0	0.015	0.0092	0.006	0	0.0104	0.0067	0.0051	0	0.0034	0	0.0182	0.0051	0.0084	0.0183	0	0	0.0057	0.0001	0.0023	0.0057	0	0.0098	0	0	0	0.0115	0.0011	0.0197	0	0.0016	0.0143	0	0	0.0008	0.0214	0	0.0127	0.0131	0.0198	0.0211	0.0093	0.0054	0.0258	0	0.0037
CLP	0.0476	0.0168	0.0185	0.0457	0.0063	0.0082	0.0078	0.0107	0.0184	0.0262	0.006	0.0275	0.0218	0.0437	0.0172	0.0216	0.0117	0.0185	0.0122	0.0452	0.0216	0.038	0	0.0472	0.0155	0.0272	0.0299	0.0217	0.0243	0.0146	0.0511	0.0142	0.0395	0.0231	0.0778	0.0518	0.0047	0.0383	0.0408	0.0036	0.028	0.0125	0.0489	0.0358	0.0356	0.0451	0.0339	0.0095	0.0367
CMP	0	0	0.0042	0	0.009	0	0.0022	0.0036	0	0	0.0007	0.0076	0.0068	0.0169	0	0.0335	0	0	0.0165	0	0.0327	0	0	0.0097	0	0	0.0003	0	0	0.0103	0.0138	0	0	0	0	0.0019	0	0.0051	0.0183	0	0	0.0006	0	0	0.0159	0	0	0.0113	0
Chondrocytes	0.0816	0.0222	0.1603	0.0497	0	0	0	0.1434	0	0.0066	0.17	0.1593	0.0334	0.153	0	0.0661	0.0596	0.1981	0.0627	0.1519	0.0528	0.1537	0.0846	0.1139	0.1075	0	0.1371	0.0652	0	0.046	0.1759	0	0.1302	0.0752	0.185	0.1191	0.0225	0.1791	0.0336	0	0.0348	0.0957	0.0601	0.0461	0.1476	0.0671	0	0.093	0
Class-switched memory B-cells	0.0004	0	0	0	0.043	0.029	0.064	0	0.0409	0	0	0	0	0	0.0097	0.01	0	0	0	0	0.011	0	0	0	0	0	0	0	0	0.0121	0	0	0	0.0169	0	0	0	0	0	0.0424	0.0051	0	0	0.0008	0	0	0	0	0.0188
DC	0	0	0	0	0	0	0	0.0068	0	0	0	0	0	0.0048	0	0	0	0	0.0017	0	0.0003	0	0	0	0.0062	0	0	0	0	0.0012	0.0009	0.002	0	0.0132	0.0004	0.0031	0	0	0.0062	0.0048	0	0.0015	0.0091	0.0039	0.0582	0	0	0	0.0046
Endothelial cells	0.0094	0.0295	0.0226	0.0279	0.0728	0	0.0363	0.0229	0.0269	0.0648	0.0516	0.0245	0.0635	0	0.0893	0.0002	0	0.0269	0.062	0.0275	0.0072	0.045	0.0353	0.0707	0.0931	0.141	0.0389	0.0735	0.0868	0.0577	0.0461	0.1085	0.0891	0.1531	0.0654	0.0911	0.1316	0.0728	0.0317	0.0671	0.0576	0.0503	0.0464	0	0.0028	0.0213	0.0233	0.1408	0.0027
Eosinophils	0	0	0	0.0012	0.0033	0.0012	0	0	0	0	0	0	0	0	0	0.0116	0.0075	0	0	0	0.0065	0	0	0	0	0.0027	0	0	0	0	0	0	0	0	0	0	0	0	0	0	0	0.0017	0	0	0	0	0	0	0
Epithelial cells	0.0004	0	0.0054	0.006	0.0766	0.0327	0.007	0.0178	0	0.0005	0.0012	0	0.0128	0	0.001	0	0.0055	0.0271	0	0.0156	0	0.0174	0	0	0	0.0017	0	0.0081	0	0.0084	0	0.0037	0.0065	0.0052	0.0095	0.0068	0	0.0208	0.0008	0.0048	0.0184	0.0016	0.0124	0.0082	0.0049	0.0271	0	0	0.0075
Erythrocytes	0	0	0	0	0	0	0	0	0	0	0	0	0	0	0	0	0	0	0	0	0.0005	0	0	0.0021	0	0	0	0.0003	0	0	0.0012	0	0	0	0	0.0009	0	0.0002	0.0004	0	0.001	0	0	0	0.0002	0	0	0	0
Fibroblasts	0	0.0605	0.1302	0.0876	0.0439	0	0	0.1828	0.0386	0.2456	0.1415	0.0983	0.1942	0.2309	0	0.2462	0.0904	0.1816	0.3334	0.2083	0.254	0.2415	0.1947	0.1421	0.3783	0.061	0.2042	0.0818	0	0.2074	0.2768	0.105	0.1512	0.1248	0.1891	0.1632	0.2116	0.174	0.0803	0.1987	0.041	0.2019	0.1475	0.1908	0.2547	0.0905	0	0.3863	0
GMP	0	0	0	0	0	0	0	0	0	0	0	0.006	0	0.0114	0	0.0177	0	0	0	0	0.0152	0	0	0	0	0	0.0007	0.0056	0	0	0.0216	0	0	0	0	0	0	0.0039	0.0196	0	0	0	0	0	0.0031	0	0.0017	0	0
HSC	0.1132	0.2018	0.103	0.1763	0.1842	0.0594	0.0215	0.3184	0.0861	0.1519	0.4009	0.1528	0.355	0.21	0.0495	0.0858	0.0151	0.2646	0.1853	0.2574	0.0835	0.0942	0.2123	0.1119	0.2208	0.0746	0.1447	0.1719	0.0528	0.2001	0.2297	0.1018	0.1167	0.2526	0.2526	0.1544	0.3699	0.0973	0.1653	0.2023	0.0499	0.1719	0.0926	0.0233	0.4511	0.1469	0.0267	0.4925	0
Hepatocytes	0	0	0	0	0	0	0	0.0021	0.002	0	0	0	0	0.0027	0	0.0026	0.0003	0	0.0035	0.0056	0.0026	0.0005	0.0028	0	0.0041	0.0028	0	0	0	0.0017	0.0017	0.0006	0	0	0	0	0.0051	0	0	0.0012	0.0012	0.0012	0	0	0.0006	0	0	0	0.0006
Keratinocytes	0	0	0	0	0.0058	0.0021	0.0003	0.0006	0	0	0	0	0	0	0	0	0	0.0186	0	0	0	0	0	0	0	0	0	0.0035	0	0	0	0	0	0.0005	0	0	0	0	0	0	0	0	0	0	0	0.0037	0	0	0
MEP	0.0465	0.0881	0.0342	0.051	0.0382	0.0622	0.0366	0.0326	0.0769	0.0644	0.0254	0.0103	0.0575	0.0461	0.0879	0.0423	0.0141	0.052	0.0638	0.0434	0.0535	0.0186	0.0472	0.0281	0.0641	0.0517	0	0.0252	0.0381	0.048	0.0606	0.0488	0.026	0.007	0.0405	0.0522	0.03	0.0335	0.0602	0.009	0.0214	0.0161	0.0257	0.0484	0.0551	0.0092	0.028	0.1061	0.0526
MPP	0	0	0	0	0	0	0	0	0	0	0	0	0	0	0	0	0	0	0	0	0	0	0	0	0	0	0	0	0	0	0	0	0	0	0	0	0	0	0	0	0	0	0	0	0	0	0	0	0
MSC	0.2458	0.3025	0.0708	0.1661	0.5362	0.2267	0.0918	0.1965	0.1723	0.2465	0.1223	0	0.2401	0	0.399	0	0	0	0	0	0	0.0525	0	0	0.1181	0.2473	0	0	0.4955	0.1608	0	0.2679	0.0648	0	0.0105	0.032	0	0	0	0.0783	0.0156	0	0.0214	0.0164	0	0.0927	0.8393	0.0426	0.4272
Macrophages	0	0	0	0	0.0058	0	0	0	0	0.005	0	0	0	0	0	0	0.0033	0	0.0034	0	0	0.0049	0.0031	0	0.0252	0	0	0	0.044	0.0024	0.0009	0.0317	0.0049	0.0031	0.0054	0.0086	0	0.0031	0.0053	0.0115	0.02	0.0026	0.0336	0.0462	0	0.0072	0.0819	0.0075	0.0558
Macrophages M1	0.0018	0	0.001	0.0013	0.0104	0	0	0.0034	0	0.0178	0.0033	0.0009	0.0015	0	0	0.0006	0.0109	0.0106	0.0139	0.0099	0.0004	0.0011	0.0073	0	0.0443	0	0.0037	0.0043	0.0479	0.0111	0.0021	0.0311	0.0067	0.0066	0.0186	0.0323	0.0078	0.0055	0.0104	0.0104	0.0367	0.0099	0.052	0.0315	0	0.0214	0.0457	0.016	0.0249
Macrophages M2	0.0004	0	0.004	0.0019	0.0171	0	0	0	0	0.0104	0.0147	0.0368	0.0035	0.0374	0.0026	0.0003	0.0018	0	0.0006	0.0145	0.0002	0.0262	0.0246	0.0222	0.0087	0.0017	0.0029	0.0016	0.02	0	0.0629	0.0278	0.031	0.0051	0.0125	0.0058	0.0039	0.0191	0	0.0067	0	0.0097	0.0134	0.0847	0.0966	0.0027	0.0469	0.0138	0.0286
Mast cells	0.0161	0.0014	0.0071	0	0	0.0015	0.0218	0.0002	0.0108	0.0003	0	0.0173	0.011	0.0275	0.0005	0.0448	0.0171	0	0.0311	0.0011	0.0458	0.0008	0.0053	0.0096	0	0.0119	0.0099	0	0.0043	0.0102	0.0172	0.0114	0	0	0.006	0	0	0.0009	0.0126	0.0095	0.0031	0.0205	0.0139	0.0115	0.0001	0	0.0093	0.0028	0.014
Megakaryocytes	0.0005	0	0.002	0.0053	0	0	0.0105	0	0.0023	0.0055	0	0.0099	0.0037	0.001	0.0052	0.005	0.0033	0.0008	0.0135	0.0034	0.0079	0.0053	0.0019	0.0148	0.0038	0.0036	0.0071	0.0006	0	0.0073	0.0071	0.002	0.0061	0.006	0.0023	0	0.0072	0.0039	0.0084	0.0055	0.0016	0.0048	0.0033	0	0	0.0025	0	0.0144	0
Melanocytes	0.0013	0.0006	0.002	0.0006	0.0046	0	0.0001	0.0084	0.004	0.0018	0.0031	0	0.0021	0	0	0	0	0	0.0004	0	0	0.004	0	0	0.0154	0.0042	0	0	0	0.0028	0	0.0015	0.0037	0	0.0009	0.0006	0.0064	0	0	0.0066	0.0001	0.0018	0.0024	0.0152	0	0.0018	0.0026	0.0077	0.0062
Memory B-cells	0	0	0	0	0	0	0	0	0	0	0	0	0	0	0	0	0	0	0	0	0	0	0	0	0	0	0	0	0	0	0	0	0	0	0	0	0	0	0	0	0	0	0	0.0039	0	0	0	0	0
Mesangial cells	0	0	0.0154	0.0089	0	0.0023	0	0.0454	0	0	0	0	0	0	0	0	0	0	0.0062	0	0	0	0	0	0	0	0.0058	0.024	0	0	0	0	0	0.0298	0	0	0	0	0	0	0	0.0417	0.0351	0.0208	0	0	0	0.0184	0
Monocytes	0	0	0	0	0.0084	0	0	0	0	0.0011	0	0	0	0.009	0	0.0022	0.0015	0	0.0037	0	0.0018	0	0	0	0.0216	0	0.0017	0	0.0119	0.0209	0.0015	0.0213	0	0.0054	0.0016	0.0191	0	0	0.0009	0.0175	0.0108	0.0042	0.0253	0.0086	0.0054	0	0.075	0	0.0466
Myocytes	0.0069	0.0006	0.0155	0.0155	0.0351	0.0219	0.0058	0.0034	0.0143	0.0105	0.0097	0.0525	0.0362	0.031	0.0054	0.0539	0.019	0.2232	0.0444	0.0344	0.0511	0.0573	0.0076	0.0868	0.0419	0.0003	0.0383	0.0341	0.1877	0.0394	0.0624	0.1359	0.0322	0.0318	0.0151	0.0094	0.0072	0.0285	0.0069	0	0.41	0.0048	0.0283	0.0282	0.0228	0.0137	0	0.0362	0.0253
NK cells	0	0	0	0	0	0	0	0	0	0	0	0	0	0	0	0	0	0	0	0	0	0	0	0	0	0	0	0	0	0	0	0	0	0	0	0	0	0	0	0	0	0	0.0036	0	0	0	0	0	0
NKT	0.0629	0.0219	0.0603	0.1164	0.1051	0.0418	0.046	0.0099	0.0112	0.0645	0.0266	0.1434	0.0654	0.1939	0.071	0.0371	0.0521	0	0.0453	0.1417	0.0423	0.2363	0	0.1925	0.1064	0.0251	0.169	0.0701	0.0142	0.0267	0.1863	0.0135	0.2091	0.0855	0.1156	0.255	0.0315	0.174	0.0631	0.0383	0.0409	0.0129	0.0743	0.0738	0.1747	0.0656	0.0648	0.072	0.0426
Neurons	0.0188	0.0362	0.0171	0.0148	0.0846	0.029	0.0629	0.0477	0.0498	0.0096	0.0378	0.0112	0.011	0.0127	0.053	0.0096	0.0256	0.031	0.008	0.0075	0.009	0.008	0.0267	0.0148	0.0179	0.0307	0.0188	0.021	0.0062	0.0121	0.008	0.0006	0.0179	0.0318	0.0059	0.0152	0.0218	0.0143	0.0178	0.0186	0.0118	0.0236	0.0225	0.0183	0.0104	0.0203	0.0075	0.0196	0.0015
Neutrophils	0	0	0.0007	0	0	0	0	0.0021	0	0	0	0.0053	0	0.0066	0	0.0044	0.0004	0	0.001	0	0.0048	0	0	0	0	0	0.0055	0	0	0	0.0054	0	0	0	0.0002	0	0.0025	0	0	0.0013	0	0	0	0	0.0024	0	0	0	0
Osteoblast	0.0184	0.0242	0.004	0.0122	0.0382	0.0356	0.0309	0.0254	0.0816	0	0.0756	0.035	0.0385	0	0.0159	0.0149	0.028	0.0232	0.0096	0.0125	0.0219	0.0319	0.0416	0.0074	0	0.0392	0	0.0421	0	0.035	0.0176	0.0317	0.0315	0.0035	0	0.0322	0.0519	0	0.0724	0	0	0	0.0138	0.0266	0	0	0	0	0
Pericytes	0	0.0516	0	0.0369	0	0.0503	0.0684	0.1461	0.0234	0	0.0778	0	0	0.0199	0	0.0442	0.002	0.0423	0.1107	0.1525	0.0412	0.061	0.0811	0.0232	0.3418	0.0451	0.0081	0	0.0166	0.0309	0	0.3924	0	0.0569	0	0.0196	0.0803	0.0612	0	0.2572	0.0596	0.0434	0.0666	0.0592	0.0132	0	0	0.0748	0.0846
Plasma cells	0	0.0239	0.001	0.0023	0.044	0.0186	0.0081	0	0.0285	0.0019	0.0055	0.0108	0.0118	0.0137	0.0375	0.0054	0.0107	0.0062	0.0015	0	0.0086	0.008	0.0138	0.0051	0.0025	0.0404	0.0031	0.028	0.0143	0.0155	0.0043	0.0075	0.0089	0	0	0	0	0.013	0.0004	0.0171	0.0088	0.0017	0.0193	0.0169	0.0102	0.0035	0.0099	0	0
Platelets	0	0	0	0	0	0	0.0144	0	0	0	0	0.0129	0	0	0	0.024	0.0059	0	0	0	0.0229	0	0	0	0	0	0	0	0	0	0	0	0	0	0	0	0	0	0.0043	0	0.0001	0	0.0009	0	0	0	0	0	0
Preadipocytes	0	0	0	0	0	0	0	0	0.0449	0	0	0	0	0	0	0.1152	0	0	0.0077	0	0.1166	0	0	0	0.0613	0.0927	0	0	0	0.0066	0	0.0133	0	0	0	0	0.0735	0.0054	0.034	0.0106	0.0039	0.0707	0	0	0	0.0578	0	0	0
Sebocytes	0.0014	0	0	0	0.0023	0.0001	0	0	0	0	0	0	0.0003	0	0	0	0.0005	0	0	0.0008	0	0.0012	0	0.0005	0	0	0	0.0002	0	0	0	0.0009	0	0.0001	0.0024	0	0	0.0007	0	0	0	0	0	0.0004	0.0015	0	0	0	0
Skeletal muscle	0	0	0	0	0	0	0	0.0019	0.0076	0	0	0	0	0	0	0	0	0.2734	0	0	0	0.006	0	0	0.0034	0.0054	0	0	0.1533	0	0	0.1271	0	0	0	0	0	0	0	0	0.322	0.0022	0	0	0	0	0	0	0
Smooth muscle	0.1588	0.1046	0.0609	0.2137	0	0.1073	0.2018	0.1214	0.3574	0.2095	0.1565	0.4283	0.2559	0.348	0.0923	0.3041	0.1564	0.2319	0.3554	0.1715	0.3208	0.181	0.3321	0.2564	0.2839	0.2568	0.3441	0.3209	0.2189	0.1925	0.3655	0.278	0.2051	0.2914	0.2326	0.1469	0.3119	0.2642	0.4401	0.3306	0.2598	0.3233	0.138	0.1796	0.1567	0.3574	0.106	0.3202	0.3202
Tgd cells	0	0.0026	0	0	0	0	0.0099	0	0	0	0.0064	0	0	0	0	0	0.0081	0	0	0	0	0	0.0097	0	0	0	0	0	0	0	0	0.0078	0	0	0	0	0.002	0	0.0032	0.019	0	0	0.0003	0.0201	0	0.0233	0	0	0
Th1 cells	0	0.1165	0.0231	0	0.0906	0.0941	0.018	0.0266	0.0559	0.0641	0	0	0.0126	0	0.0886	0	0	0.0309	0	0.0226	0	0.0202	0	0	0.0055	0.0578	0	0	0.0283	0.0171	0	0.072	0	0	0	0	0.029	0	0	0.0246	0	0	0.0132	0.0145	0	0	0.0054	0	0.0129
Th2 cells	0.447	0.0593	0.3891	0.3169	0	0	0.0544	0.0467	0.0077	0.2639	0.0912	0.0705	0	0.0722	0	0.1159	0.2228	0.0832	0.108	0.256	0.1373	0.1296	0.0515	0.2731	0.1168	0	0.1931	0.284	0.3001	0.0313	0.2079	0.1676	0.2242	0.1949	0.4525	0.3294	0.1214	0.2792	0.2753	0.0393	0.2836	0.2493	0.0809	0.1851	0.1898	0.1564	0.1502	0.128	0.355
Tregs	0	0	0	0	0	0	0	0.0214	0	0	0.0023	0	0	0	0	0.0224	0	0	0	0	0.0147	0	0	0	0	0	0	0	0	0	0	0	0	0	0	0	0	0	0	0.0114	0	0.0192	0.0321	0.0161	0	0	0.0106	0	0
aDC	0.0375	0	0.0201	0.0351	0.1203	0	0.0053	0.0948	0	0.0846	0.074	0.0455	0.0044	0.1244	0.0546	0.0314	0.0944	0.0253	0.0616	0.0647	0.0511	0.1061	0.1113	0.0559	0.0561	0.0472	0.0945	0.095	0.1328	0.082	0.1159	0.1334	0.0832	0.1666	0.155	0.1771	0.0978	0.0829	0.1134	0.069	0.1492	0.1255	0.1271	0.224	0.3805	0.1028	0.2272	0.1718	0.1667
cDC	0.0131	0	0.0008	0.001	0.0091	0	0.0018	0.0417	0.0141	0.0067	0.043	0.0239	0.0039	0.0697	0	0.0243	0	0.0309	0.0442	0.027	0.0307	0.0128	0.0605	0.0211	0.0572	0.0507	0.0055	0.0088	0.0232	0.0669	0.0548	0.0252	0.0018	0.1131	0.0365	0.0896	0.0159	0.0181	0.0219	0.05	0.0102	0.0142	0.0249	0	0.1742	0.0187	0.0136	0.0483	0.0487
iDC	0	0	0.0077	0.0029	0.1064	0.121	0.0489	0.2355	0.0876	0.0542	0	0.0233	0.0334	0.1551	0.0047	0.0581	0.0091	0.0381	0.1398	0.0211	0.034	0	0.0849	0.0259	0.2951	0.0943	0.0097	0.018	0.0175	0.1434	0.0108	0.0385	0.0889	0.2395	0.0774	0.1846	0	0.0057	0.1617	0.2765	0.0347	0.0126	0.113	0	0.5178	0	0.0466	0.0737	0.1257
ly Endothelial cells	0	0.0042	0.0065	0.0102	0.0383	0	0.0115	0.001	0.0059	0.0305	0.0005	0.0045	0.0309	0	0.0471	0	0	0.002	0.0293	0.0124	0.0021	0.0143	0.0054	0.0269	0.0319	0.0684	0.0147	0.0229	0.0184	0.0254	0.0061	0.0238	0.0351	0.0587	0.0175	0.0469	0.0482	0.0171	0.0037	0.0191	0.013	0.0195	0.0121	0	0.0032	0.0036	0.0071	0.0724	0
mv Endothelial cells	0.0019	0.0223	0.0117	0.0139	0.0951	0	0.0143	0.0067	0.0056	0.0413	0.0137	0.007	0.0319	0	0.0758	0	0	0.0059	0.0226	0.0164	0	0.0209	0.0121	0.0287	0.0478	0.0952	0.0101	0.0282	0.0364	0.0367	0.0159	0.0503	0.0379	0.0714	0.0295	0.0551	0.0609	0.0181	0.0049	0.0594	0.0286	0.0135	0.0166	0	0.0097	0.0029	0.0144	0.063	0.0022
naive B-cells	0	0	0	0	0	0	0	0	0	0	0	0	0	0	0	0	0	0	0	0	0	0	0	0	0	0	0	0	0	0	0	0.0052	0	0	0	0	0	0	0	0	0.0046	0	0	0.0012	0	0	0.0061	0	0
pDC	0.0017	0	0.0007	0.0008	0.1114	0.0562	0.0279	0	0.0104	0	0	0.0137	0.0019	0.0007	0.0021	0.0036	0.0087	0	0	0.0004	0.0046	0.0198	0	0.0208	0.0009	0	0.0103	0	0	0	0.003	0.0167	0.0104	0	0.0272	0.016	0	0.0152	0	0.0407	0.0196	0	0	0.0257	0	0.0021	0.0131	0	0.0117
pro B-cells	0.0161	0	0.0161	0	0.0229	0.0229	0	0	0	0.0012	0	0	0	0	0.0323	0	0.0225	0.0071	0	0.0058	0	0	0	0	0	0	0	0	0.0206	0	0	0.01	0	0	0	0	0	0.0104	0	0	0.0343	0	0	0.0093	0	0	0	0	0.0178
ImmuneScore	0.0107	0.0009	0.0052	0.0008	0.0117	0.0018	0.0361	0.0061	0.0192	0.0046	0	0.0151	0.0205	0.0319	0.0003	0.088	0.0229	0	0.0311	0.0007	0.0781	0.0038	0.0056	0.0064	0.0353	0.0173	0.0114	0	0.0401	0.0416	0.0193	0.0505	0.0033	0.0145	0.0091	0.0205	0.0017	0.0027	0.0282	0.0376	0.046	0.0311	0.0622	0.1184	0.0441	0.0048	0.1329	0.0102	0.1108
StromaScore	0.0061	0.047	0.0789	0.0617	0.0584	0	0.0182	0.1028	0.0328	0.1552	0.0993	0.0614	0.1337	0.1154	0.0446	0.1232	0.0452	0.1053	0.1977	0.1179	0.1306	0.1443	0.117	0.1064	0.2401	0.101	0.1216	0.0776	0.0434	0.1326	0.1614	0.1068	0.1202	0.1404	0.1317	0.1314	0.1716	0.1247	0.056	0.1329	0.0493	0.1264	0.0983	0.1025	0.133	0.0559	0.0116	0.2658	0.0014
MicroenvironmentScore	0.0168	0.048	0.0841	0.0625	0.07	0.0018	0.0543	0.1089	0.052	0.1598	0.0993	0.0765	0.1541	0.1474	0.045	0.2112	0.0681	0.1053	0.2288	0.1186	0.2087	0.1481	0.1226	0.1128	0.2754	0.1183	0.1329	0.0776	0.0835	0.1742	0.1807	0.1573	0.1234	0.1549	0.1408	0.1519	0.1733	0.1274	0.0842	0.1705	0.0953	0.1574	0.1605	0.2209	0.1771	0.0607	0.1446	0.276	0.1122
TCGA, The Cancer Genome Atlas.
[truncated: 206 more columns]
